# Supplementary material for: Finger Tapping as a Biomarker to Classify Cognitive Status in 80+-Year-Olds
Source: MDPI journal article supplement (doi:10.3390/jpm12020286), 2022-02-15
Supplement: s1 [file s1]

# Supplementary Material: Finger Tapping as a Biomarker to Classify Cognitive Status in 80+-Year-Olds

Dieter F. Kutz, Stephanie Fröhlich, Julian Rudisch, Katrin Müller and Claudia Voelcker-Rehage

**Table S1.** Mean values of the tapping parameters for both conditions of each group (retransformed into physical dimensions).

|                         | Self-Selected Pace   |                       |                      | Fast Pace            |                       |                                   |
|-------------------------|----------------------|-----------------------|----------------------|----------------------|-----------------------|-----------------------------------|
|                         | CHI ( <i>n</i> = 79) | pMCI ( <i>n</i> = 80) | MCI ( <i>n</i> = 66) | CHI ( <i>n</i> = 79) | pMCI ( <i>n</i> = 80) | MCI <sup>1</sup> ( <i>n</i> = 65) |
| tap-cycle_median        | 0.553                | 0.648                 | 0.644                | 0.237                | 0.252                 | 0.255                             |
| tap-cycle_iqr           | 0.056                | 0.061                 | 0.067                | 0.026                | 0.028                 | 0.032                             |
| tap-duration_median     | 0.186                | 0.221                 | 0.227                | 0.107                | 0.111                 | 0.117                             |
| tap-duration_iqr        | 0.035                | 0.042                 | 0.043                | 0.020                | 0.020                 | 0.021                             |
| offphase_median         | 0.355                | 0.411                 | 0.401                | 0.130                | 0.139                 | 0.138                             |
| offphase_iqr            | 0.053                | 0.059                 | 0.062                | 0.024                | 0.024                 | 0.026                             |
| force-peak_median       | 17.48                | 16.94                 | 22.04                | 13.87                | 14.96                 | 20.65                             |
| force-peak_iqr          | 0.638                | 0.552                 | 0.721                | 0.635                | 0.657                 | 0.834                             |
| time-to-peak_median     | 0.091                | 0.106                 | 0.111                | 0.051                | 0.053                 | 0.056                             |
| time-to-peak_iqr        | 0.020                | 0.025                 | 0.027                | 0.009                | 0.010                 | 0.010                             |
| flexion_median          | 0.024                | 0.021                 | 0.025                | 0.029                | 0.030                 | 0.040                             |
| flexion_iqr             | 0.008                | 0.007                 | 0.009                | 0.011                | 0.011                 | 0.014                             |
| extension_median        | 0.024                | 0.022                 | 0.027                | 0.026                | 0.027                 | 0.036                             |
| extension_iqr           | 0.009                | 0.008                 | 0.009                | 0.010                | 0.010                 | 0.012                             |
| time-to-plateau_median  | 0.066                | 0.068                 | 0.073                | 0.047                | 0.048                 | 0.051                             |
| time-to-plateau_iqr     | 0.012                | 0.012                 | 0.015                | 0.008                | 0.008                 | 0.008                             |
| plateau-duration_median | 0.065                | 0.090                 | 0.090                | 0.029                | 0.030                 | 0.032                             |
| plateau-duration_iqr    | 0.023                | 0.032                 | 0.032                | 0.005                | 0.005                 | 0.006                             |

Given are group means. CHI: cognitively healthy individuals; MCI: participants with mild cognitive impairment; pMCI: participants with possible MCI. Note: units for time values are in s, those for force are in *n* and those for flexion/extension are in N/s. Suffix \_median specifies medians and \_iqr the inter-quartile range.<sup>1</sup>: For technical reasons, the data for one participant from the fast pace condition are missing.

**Table S2.** Logarithmized tapping parameters for female participants for both conditions and each group.

|                         | Self-Selected Pace   |                       |                      | Fast Pace            |                       |                      |
|-------------------------|----------------------|-----------------------|----------------------|----------------------|-----------------------|----------------------|
|                         | CHI ( <i>n</i> = 44) | pMCI ( <i>n</i> = 37) | MCI ( <i>n</i> = 28) | CHI ( <i>n</i> = 44) | pMCI ( <i>n</i> = 37) | MCI ( <i>n</i> = 28) |
| tap-cycle_median        | −0.602 ± 0.058       | −0.4036 ± 0.071       | −0.4914 ± 0.081      | −1.390 ± 0.028       | −1.303 ± 0.032        | −1.406 ± 0.042       |
| tap-cycle_iqr           | −2.806 ± 0.099       | −2.751 ± 0.124        | −2.798 ± 0.145       | −3.481 ± 0.088       | −3.530 ± 0.071        | −3.422 ± 0.100       |
| tap-duration_median     | −1.689 ± 0.068       | −1.496 ± 0.076        | −1.635 ± 0.095       | −2.208 ± 0.029       | −2.175 ± 0.038        | −2.211 ± 0.030       |
| tap-duration_iqr        | −3.368 ± 0.111       | −3.086 ± 0.125        | −3.172 ± 0.149       | −3.834 ± 0.051       | −3.841 ± 0.052        | −3.908 ± 0.080       |
| offphase_median         | −1.042 ± 0.059       | −0.8404 ± 0.075       | −0.9178 ± 0.087      | −1.974 ± 0.034       | −1.854 ± 0.040        | −2.001 ± 0.055       |
| offphase_iqr            | −2.885 ± 0.076       | −2.786 ± 0.107        | −2.824 ± 0.125       | −3.578 ± 0.078       | −3.653 ± 0.073        | −3.590 ± 0.099       |
| force-peak_median       | 0.4979 ± 0.144       | 0.4938 ± 0.179        | 0.2678 ± 0.179       | 0.2811 ± 0.107       | 0.3335 ± 0.152        | 0.4111 ± 0.146       |
| force-peak_iqr          | −0.5105 ± 0.157      | −0.5945 ± 0.199       | −0.6026 ± 0.188      | −0.4287 ± 0.107      | −0.4882 ± 0.146       | −0.3709 ± 0.160      |
| time-to-peak_median     | −2.415 ± 0.073       | −2.224 ± 0.078        | −2.374 ± 0.098       | −2.950 ± 0.026       | −2.923 ± 0.038        | −2.955 ± 0.027       |
| time-to-peak_iqr        | −3.978 ± 0.138       | −3.626 ± 0.162        | −3.710 ± 0.168       | −4.590 ± 0.050       | −4.608 ± 0.057        | −4.683 ± 0.074       |
| flexion_median          | −3.797 ± 0.106       | −3.906 ± 0.137        | −4.066 ± 0.135       | −3.616 ± 0.095       | −3.591 ± 0.128        | −3.486 ± 0.129       |
| flexion_iqr             | −4.912 ± 0.120       | −4.869 ± 0.161        | −5.010 ± 0.143       | −4.497 ± 0.101       | −4.585 ± 0.147        | −4.449 ± 0.150       |
| extension_median        | −3.792 ± 0.114       | −3.882 ± 0.148        | −4.042 ± 0.143       | −3.721 ± 0.088       | −3.709 ± 0.124        | −3.593 ± 0.119       |
| extension_iqr           | −4.877 ± 0.128       | −4.906 ± 0.147        | −5.023 ± 0.138       | −4.674 ± 0.092       | −4.711 ± 0.132        | −4.613 ± 0.134       |
| time-to-plateau_median  | −2.709 ± 0.049       | −2.658 ± 0.062        | −2.720 ± 0.067       | −3.023 ± 0.019       | −3.023 ± 0.029        | −3.032 ± 0.022       |
| time-to-plateau_iqr     | −4.508 ± 0.143       | −4.429 ± 0.126        | −4.307 ± 0.148       | −4.776 ± 0.046       | −4.841 ± 0.062        | −4.892 ± 0.062       |
| plateau-duration_median | −2.781 ± 0.106       | −2.397 ± 0.118        | −2.598 ± 0.141       | −3.527 ± 0.032       | −3.454 ± 0.045        | −3.539 ± 0.032       |
| plateau-duration_iqr    | −3.824 ± 0.181       | −3.385 ± 0.170        | −3.634 ± 0.197       | −5.319 ± 0.081       | −5.224 ± 0.110        | −5.277 ± 0.103       |

Given are means ± SEM. CHI: cognitively healthy individuals; MCI: participants with mild cognitive impairment; pMCI: participants with possible MCI. Note: units for time values are in log(s), those for force are in log(N) and those for flexion/extension are in log(N/s). Suffix \_median specifies group medians and \_iqr the inter-quartile range of the group.

**Table S3.** Logarithmized tapping parameters for male participants for both conditions and each group.

|                          | Self Selected Pace   |                       |                      | Fast Pace            |                       |                      |
|--------------------------|----------------------|-----------------------|----------------------|----------------------|-----------------------|----------------------|
|                          | CHI ( <i>n</i> = 35) | pMCI ( <i>n</i> = 43) | MCI ( <i>n</i> = 38) | CHI ( <i>n</i> = 35) | pMCI ( <i>n</i> = 43) | MCI ( <i>n</i> = 37) |
| tap-cycle_median         | −0.5813 ± 0.077      | −0.4587 ± 0.059       | −0.4028 ± 0.079      | −1.508 ± 0.026       | −1.447 ± 0.038        | −1.335 ± 0.040       |
| tap-cycle_iqr            | −2.985 ± 0.132       | −2.828 ± 0.106        | −2.633 ± 0.135       | −3.880 ± 0.086       | −3.649 ± 0.071        | −3.469 ± 0.120       |
| tap-duration_median      | −1.672 ± 0.075       | −1.523 ± 0.077        | −1.370 ± 0.086       | −2.278 ± 0.027       | −2.227 ± 0.037        | −2.092 ± 0.044       |
| tap-duration_iqr         | −3.360 ± 0.093       | −3.248 ± 0.106        | −3.114 ± 0.111       | −4.071 ± 0.078       | −3.977 ± 0.052        | −3.839 ± 0.072       |
| offphase_median          | −1.031 ± 0.089       | −0.9318 ± 0.064       | −0.913 ± 0.084       | −2.136 ± 0.033       | −2.071 ± 0.045        | −1.969 ± 0.046       |
| offphase_iqr             | −2.995 ± 0.117       | −2.879 ± 0.094        | −2.763 ± 0.113       | −3.952 ± 0.076       | −3.836 ± 0.074        | −3.700 ± 0.109       |
| force-peak_median        | 0.6343 ± 0.167       | 0.5556 ± 0.119        | 1.175 ± 0.187        | 0.3852 ± 0.150       | 0.4627 ± 0.105        | 0.9625 ± 0.153       |
| force-peak_iqr           | −0.3712 ± 0.207      | −0.5939 ± 0.147       | −0.1253 ± 0.157      | −0.486 ± 0.162       | −0.3607 ± 0.102       | −0.03877 ± 0.168     |
| time-to-peak_median      | −2.373 ± 0.082       | −2.265 ± 0.083        | −2.062 ± 0.098       | −3.015 ± 0.028       | −2.954 ± 0.039        | −2.830 ± 0.046       |
| time-to-peak_iqr         | −3.879 ± 0.127       | −3.782 ± 0.154        | −3.552 ± 0.151       | −4.786 ± 0.077       | −4.651 ± 0.054        | −4.615 ± 0.083       |
| flexion_median           | −3.674 ± 0.130       | −3.806 ± 0.094        | −3.389 ± 0.141       | −3.469 ± 0.134       | −3.436 ± 0.084        | −3.032 ± 0.129       |
| flexion_iqr              | −4.779 ± 0.173       | −4.992 ± 0.107        | −4.582 ± 0.142       | −4.497 ± 0.149       | −4.422 ± 0.096        | −4.199 ± 0.142       |
| extension_median         | −3.664 ± 0.141       | −3.802 ± 0.097        | −3.323 ± 0.151       | −3.561 ± 0.137       | −3.508 ± 0.085        | −3.121 ± 0.131       |
| extension_iqr            | −4.627 ± 0.185       | −4.887 ± 0.112        | −4.571 ± 0.137       | −4.561 ± 0.147       | −4.512 ± 0.084        | −4.314 ± 0.149       |
| time-to-plateau_median   | −2.740 ± 0.061       | −2.702 ± 0.051        | −2.541 ± 0.070       | −3.090 ± 0.022       | −3.035 ± 0.031        | −2.950 ± 0.032       |
| time-to-plateau_iqr      | −4.368 ± 0.137       | −4.465 ± 0.127        | −4.182 ± 0.153       | −4.992 ± 0.069       | −4.868 ± 0.057        | −4.885 ± 0.090       |
| plateau-duration_mediana | −2.670 ± 0.110       | −2.414 ± 0.121        | −2.269 ± 0.129       | −3.573 ± 0.039       | −3.525 ± 0.045        | −3.376 ± 0.063       |
| plateau-duration_iqr     | −3.721 ± 0.152       | −3.519 ± 0.172        | −3.287 ± 0.179       | −5.382 ± 0.099       | −5.325 ± 0.081        | −5.153 ± 0.125       |

Given are means ± SEM. CHI: cognitively healthy individuals; MCI: participants with mild cognitive impairment; pMCI: participants with possible MCI. Note: units for time values are in log(s), those for force are in log(N) and those for flexion/extension are in log(N/s). Suffix \_median specifies group medians and \_iqr the inter-quartile range of the group.

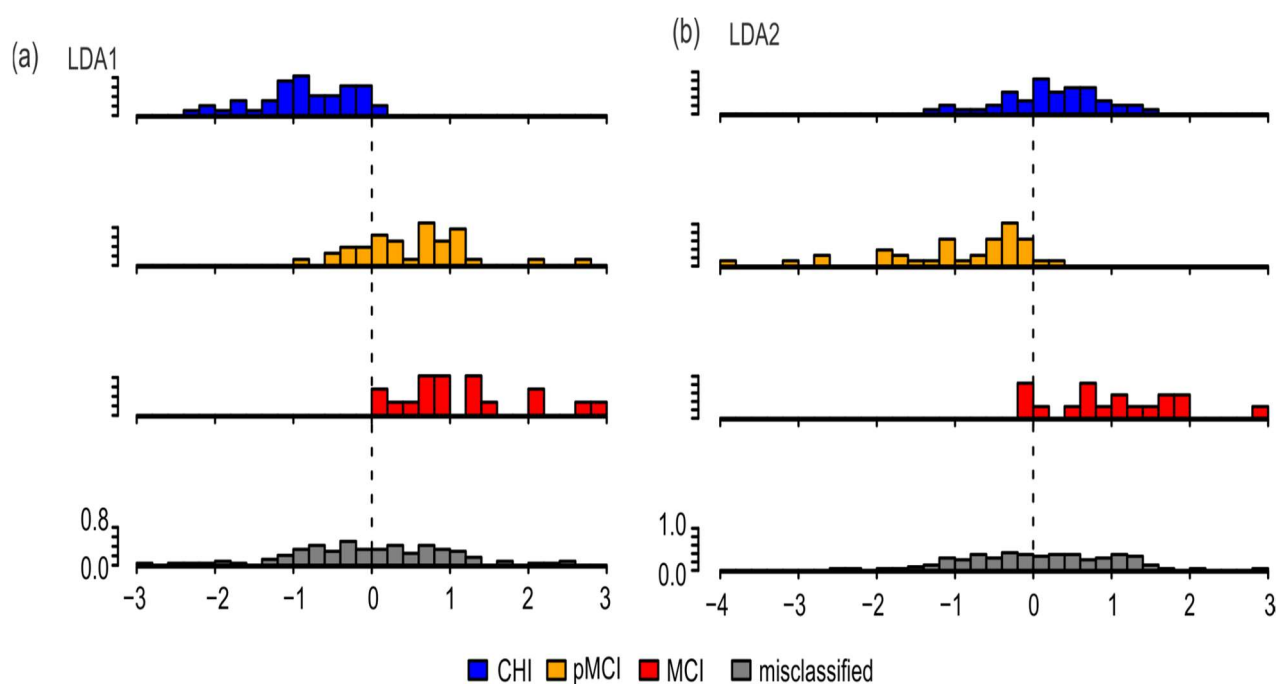

**Figure S1.** Histograms of probability densities of LDA values of correctly classified and misclassified participants, using only parameters that were significant for the effect group. (a) LDA1; (b) LDA2. CHI: cognitively healthy individuals; pMCI: participants with possible mild cognitive impairments; MCI: participants with mild cognitive impairments.
